# Supplementary material
Source: HighWire-hosted journal article supplement (https://bmjopen.bmj.com/content/7/10/e017098)
Supplement: inline-supplementary-material-1 [file inline-supplementary-material-1.pdf]

Supplementary file: Primer sequences for amplification and sequencing of the *GLA* gene.

| Fragment                         | Sequence                                                                            | Size (bp) |
|----------------------------------|-------------------------------------------------------------------------------------|-----------|
| <b>Genomic DNA amplification</b> |                                                                                     |           |
| Exon 1                           | Forward: 5'- CCCAGTTGCCAGAGAAACAATAAC-3'<br>Reverse: 5'-AGACTCTCCAGTTCCCCAAACAC -3' | 391       |
| Exon 2                           | Forward: 5'-CCCAAGGTGCCTAATAAATGG -3'<br>Reverse: 5'-CCATGAGGGCTGTTTCTAA -3'        | 337       |
| Exon 3                           | Forward: 5'-CGCAGCCTGGAATGGTTCTCTC -3'<br>Reverse: 5'-CTCAGCTACCATGGCCTCA -3'       | 323       |
| Exon 4                           | Forward: 5'-AGCTGGAAATTCATTTCTTT -3'<br>Reverse: 5'-TTGGTTTCCTTTGTTGTCA -3'         | 212       |
| Exons 5-7                        | Forward: 5'-AAACTCAAGAGAAGGCTACAAGT -3'<br>Reverse: 5'-AAAAAGGTGGACAGGAAGTAGTAGT 3' | 1280      |
| <b>Sequencing Primers</b>        |                                                                                     |           |
| Exon 1 forward                   | 5'- CCCAGTTGCCAGAGAGAAACAATAAC-3'                                                   |           |
| Exon 2 forward                   | 5'-CCCAAGGTGCCTAATAAATGG -3'                                                        |           |
| Exon 3 forward                   | 5'-CGCAGCCTGGAATGGTTCTCTC -3'                                                       |           |
| Exon 4 forward                   | 5'-TTGGTTTCCTTTGTTGTCA -3'                                                          |           |
| Exons 5-6 forward                | 5'-AAACTCAAGAGAAGGCTACAAGT -3'                                                      |           |
| Exons 7 forward                  | 5'-TGAATGCCAAACTAACAGG                                                              |           |
